# Supplementary material
Source: HighWire-hosted journal article supplement (https://erj.ersjournals.com/content/60/1/2004361)

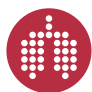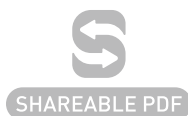

# Lysyl oxidase like 2 is increased in asthma and contributes to asthmatic airway remodelling

Jopeth Ramis<sup>1,2</sup>, Robert Middlewick<sup>3</sup>, Francesco Pappalardo<sup>1</sup>, Jennifer T. Cairns<sup>3</sup>, Iain D. Stewart<sup>3,4</sup>, Alison E. John<sup>3,4</sup>, Shams-Un-Nisa Naveed<sup>3,5</sup>, Ramaswamy Krishnan<sup>6</sup>, Suzanne Miller<sup>1,3</sup>, Dominick E. Shaw<sup>1,3</sup>, Christopher E. Brightling<sup>5</sup>, Lee Buttery<sup>1</sup>, Felicity Rose<sup>1</sup>, Gisli Jenkins<sup>3,4</sup>, Simon R. Johnson<sup>1,3</sup> and Amanda L. Tatler<sup>3</sup>

<sup>1</sup>Biodiscovery Institute, University of Nottingham, Nottingham, UK. <sup>2</sup>Dept of Chemical Engineering, Technological Institute of the Philippines, Manila, Philippines. <sup>3</sup>Centre for Respiratory Research/NIHR Biomedical Research Centre, School of Medicine, University of Nottingham, Nottingham, UK. <sup>4</sup>Margaret Turner Warwick Centre for Fibrosing Lung Disease, National Heart and Lung Institute, Imperial College London, London, UK. <sup>5</sup>Institute for Lung Health, Leicester NIHR Biomedical Research Centre, University of Leicester, Leicester, UK. <sup>6</sup>Center for Vascular Biology Research, Beth Israel Deaconess Medical Center, Harvard Medical School, Boston, MA, USA.

Corresponding author: Amanda L. Tatler ([amanda.tatler@nottingham.ac.uk](mailto:amanda.tatler@nottingham.ac.uk))

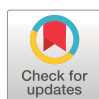

Shareable abstract (@ERSpublications)

**Novel role for matrix cross-linking enzyme LOXL2 in asthmatic airway remodelling: LOXL2 is increased in #asthma but LOXL2 inhibition reduces matrix stiffness in airway smooth muscle cells and reduces remodelling *in vivo*** <https://bit.ly/3FnzGb3>

**Cite this article as:** Ramis J, Middlewick R, Pappalardo F, *et al.* Lysyl oxidase like 2 is increased in asthma and contributes to asthmatic airway remodelling. *Eur Respir J* 2022; 60: 2004361 [DOI: 10.1183/13993003.04361-2020].

This single-page version can be shared freely online.

Copyright ©The authors 2022.

This version is distributed under the terms of the Creative Commons Attribution Licence 4.0.

Received: 30 Nov 2020  
Accepted: 8 Nov 2021

## Abstract

**Background** Airway smooth muscle (ASM) cells are fundamental to asthma pathogenesis, influencing bronchoconstriction, airway hyperresponsiveness and airway remodelling. The extracellular matrix (ECM) can influence tissue remodelling pathways; however, to date no study has investigated the effect of ASM ECM stiffness and cross-linking on the development of asthmatic airway remodelling. We hypothesised that transforming growth factor- $\beta$  (TGF- $\beta$ ) activation by ASM cells is influenced by ECM in asthma and sought to investigate the mechanisms involved.

**Methods** This study combines *in vitro* and *in vivo* approaches: human ASM cells were used *in vitro* to investigate basal TGF- $\beta$  activation and expression of ECM cross-linking enzymes. Human bronchial biopsies from asthmatic and nonasthmatic donors were used to confirm lysyl oxidase like 2 (LOXL2) expression in ASM. A chronic ovalbumin (OVA) model of asthma was used to study the effect of LOXL2 inhibition on airway remodelling.

**Results** We found that asthmatic ASM cells activated more TGF- $\beta$  basally than nonasthmatic controls and that diseased cell-derived ECM influences levels of TGF- $\beta$  activated. Our data demonstrate that the ECM cross-linking enzyme LOXL2 is increased in asthmatic ASM cells and in bronchial biopsies. Crucially, we show that LOXL2 inhibition reduces ECM stiffness and TGF- $\beta$  activation *in vitro*, and can reduce subepithelial collagen deposition and ASM thickness, two features of airway remodelling, in an OVA mouse model of asthma.

**Conclusion** These data are the first to highlight a role for LOXL2 in the development of asthmatic airway remodelling and suggest that LOXL2 inhibition warrants further investigation as a potential therapy to reduce remodelling of the airways in severe asthma.

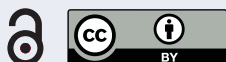

Supplement: inline-supplementary-material-8 [file inline-supplementary-material-8.pdf]
